# Supplementary material for: Ultrathin defective heterojunction for visible light NO removal: correlation between microstructure and reaction mechanisms
Source: Royal Society of Chemistry journal article supplement (doi:10.1039/d4en00362d), 2024-01-01
Supplement: d4en00362d1.pdf [file d4en00362d1.pdf]

## **Ultrathin Defective Heterojunction for Visible Light NO Removal: Correlation between Microstructure and Reaction Mechanisms**

Reshalaiti Hailili,<sup>a,b,c\*</sup> Zelong Li,<sup>a</sup> Xu Lu,<sup>a</sup> Hua Sheng,<sup>b\*</sup> Detlef W. Bahnemann,<sup>c</sup> Jincui Zhao<sup>b</sup>

<sup>a</sup>*MOE Key Laboratory of Enhanced Heat Transfer and Energy Conservation, Beijing Key Laboratory of Heat Transfer and Energy Conversion, Beijing University of Technology, Beijing 100124, P. R. China.*

<sup>b</sup>*Key Laboratory of Photochemistry, Institute of Chemistry, Chinese Academy of Sciences, Beijing 100190, P. R. China.*

<sup>c</sup>*Institut für Technische Chemie, Gottfried Wilhelm Leibniz Universität Hannover, Callinstr. 3, 30167 Hannover, Germany.*

\*Corresponding authors:

[Reshalaiti100@163.com](mailto:Reshalaiti100@163.com) (R. Hailili); [hsheng@iccas.ac.cn](mailto:hsheng@iccas.ac.cn) (H. Sheng)

**Table S1.** Magnitude Debye of polyhedra in the minimum asymmetric unit of BiVO<sub>4</sub>.

| <b>BiVO<sub>4</sub> (Dipole moment)</b> |       |       |       |               |
|-----------------------------------------|-------|-------|-------|---------------|
| symmetric                               | x     | y     | z     | Magnitude (D) |
| BiO <sub>6</sub> (x, y, z)              | 0.095 | 0.052 | 12.77 | 12.77         |

## 2. Experimental Section

**Synthesis of BiVO<sub>4</sub> monomers:** 10.0 mL glyoxal/water was subsequently added into the above solution and underwent further stirring for 20 min to obtain a uniform solution. Upon vigorous stirring, pre-dissolved NH<sub>4</sub>VO<sub>3</sub> was added to the above solution dropwise and kept magnetic stirring for another 30 min. Following this step, 10 mL of 1.0 M NaOH aqueous solution was added to the above solution to adjust the pH of the solution to 7.0 upon stirring. After that, the suspension was carefully transferred into a Teflon-lined stainless-steel autoclave, heated at 150 °C with an increase of 2 °C/min and kept for 12 h at autogenous pressure.

**Synthesis of BiOCl monomers:** For the synthesis of BiOCl monomer, 1.0 mmol Bi<sub>2</sub>(NO<sub>3</sub>)<sub>3</sub>·6H<sub>2</sub>O and 0.5 g PVP were dissolved in 10.0 mL glyoxal/water and underwent vigorous stirring for about 40 min. Upon continuous stirring, 4.5 mL saturated NaCl solution was carefully dropped into the solution as a Cl<sup>-</sup> source and stirred for another 40 min. Then, a white precipitate was obtained and further washed with deionized water until the pH reached neutral. After that, the as-obtained mixture was transferred into the Teflon-lined stainless-steel autoclave, and further treated at 150 °C for 4 h.

**Synthesis of defect-free BiVO<sub>4</sub>/BiOCl photocatalysts:** The synthesis of defect-free BiVO<sub>4</sub>/BiOCl heterojunction is the same as defective heterojunction except for the absence of reducing agent glyoxal/water.

**Characterizations.** The crystal structure of as-studied photocatalysts was analyzed by X-ray Powder Diffraction (XRD) measurements, which were carried out on a Bruker D8 ADVANCE X-ray diffractometer in the angular range of  $2\theta = 5^\circ \sim 80^\circ$  with a scan step width of  $0.02^\circ$  and a fixed counting time of 1 s/step using Cu K $\alpha$  radiation ( $\lambda = 1.5418 \text{ \AA}$ ). The light absorption was analyzed by using a Shimadzu Solidspec-3700 DUV Uv-vis spectrophotometer. The accurate amount of catalysts (45.0 mg) were further diluted by reference BaSO<sub>4</sub> and analyzed within the wavelength range of 200 nm–800 nm. A reference BaSO<sub>4</sub> was used for a baseline correction before the measurements. The structure and morphology analyses were performed by a scanning electron microscope (SEM) observation on a Hitachi S-3500N SEM. Further microstructure characters were investigated by transmission electron microscopy (TEM) and high-resolution TEM (HRTEM, JEOL-JEM 2100). Atomic force microscopy (AFM) measurements were performed to measure the thickness by using Bruker Dimension edge AFM (GER). The stabilities of the defects on the surfaces of as-investigated samples were analyzed by electron paramagnetic resonance (EPR) and XRD

measurements after long-term visible light NO conversion tests of samples.

**Photocatalytic NO removal.** In a typical procedure, the same amount of precisely measured photocatalyst (65.0 mg) was pretreated at 100 °C for 2 h to remove surface adsorbed species, then was uniformly dispersed in the distilled water to obtain a suspension. As dispersed slurry photocatalysts were further deposited in a specially designed glass dish, underwent ultrasonication for 12.0 min, and further dried at 60 °C. Then this was positioned in a designed reactor and subsequently supported by the sample holder. The vertical distance between the light and the catalyst surface was about 15.0 cm. The NO gas (13.5 ppm, balance with Ar, 99.999%) was obtained from a compressed gas cylinder from the National Institute of Standards and Technology specifications. With a continuous flow rate of 1.0 L·min<sup>-1</sup> by a mass flow controller, the NO gas was diluted by an air stream supplied by a zero-air generator to obtain the precise concentration of 500 ppb, which was completely premixed by a gas blender, accessed to the chamber and passed over the powder surface through the inlet tube. For all tests, as-obtained catalysts were suspended to the gas stream and stabilized for 30.0 min without light illumination to achieve constant gas concentration and adsorption–desorption balance.

**Temperature-programmed desorption (TPD).** The TPD of the target NO over 180.0 mg/per sample was measured on a Quantachrome Autosorb-IQ-MP system, which was equipped with a TCD detector. A predesigned temperature program was employed before the measurements to clean and remove the possible adsorbents on samples. In detail, precisely weighted samples were heated from room temperature up to 300 °C at a heating rate of 10 °C·min<sup>-1</sup> and kept at 300 °C for 60 min, then the samples were subsequently cooled to 50 °C and kept for 30 min. All this procedure was conducted under the continuous Ar flow (120.0 mL·min<sup>-1</sup>). After that, the Ar gas flow was switched to NO and kept for 60 min to establish the adsorption equilibrium. Then, the gas flow was changed back to the Ar again to remove the gaseous NO in the system, following measurements of TPD for NO proceeded when the temperature increased from 50 °C to 800 °C at a rate of 10 °C·min<sup>-1</sup>.

**Photo-electrochemical tests.** The photocurrents were performed on an electrochemical workstation (CHI 600E) with a standard three-electrode system, in which Pt was used as a counter electrode. As-synthesized catalyst-deposited indium-tin-oxide (ITO) glass substrate was used as working electrodes, and Ag/AgCl electrodes in KCl saturated solution were employed as reference electrodes, respectively. In the typical preparation of working electrodes, identical amounts of precisely

measured catalysts were dispersed in ethanol and water solution with the assistance of Nafion solution (300  $\mu$ L, 4.0 wt %) to form a homogeneous slurry. Then, the obtained pasty catalysts were deposited on the surface of ITO glass and dried naturally. A 0.20 M  $\text{Na}_2\text{SO}_4$  solution was used as the electrolyte, and the 300 W Xenon lamp ( $\lambda \geq 420$  nm) was used as a light source as was used in the activity assessment test. All the experiments were carried out at room temperature.

***In situ* Diffused Reflectance Infrared Fourier Transform (DRIFTS).** *In situ* DRIFTS measurements were conducted using a TENSOR II FT-IR spectrometer (Bruker) equipped with an *in situ* diffuse-reflectance cell (Harrick). High-purity He, high-purity  $\text{O}_2$ , and 100 ppm of NO (in He) mixtures were fed into the reaction system, and a three-way ball valve was used to switch between the target gas (NO) and purge gas (He). A Xe lamp (MUA-210, Japan) was used as the light source. Before the measurements, as-synthesized photocatalysts were pretreated 30 min at 300  $^\circ\text{C}$  in the high-temperature reaction chamber. The background spectrum is recorded before injecting reactant gas into the reaction chamber. Once the adsorption equilibrium is achieved, a visible light source is applied to initiate the photocatalytic reaction.

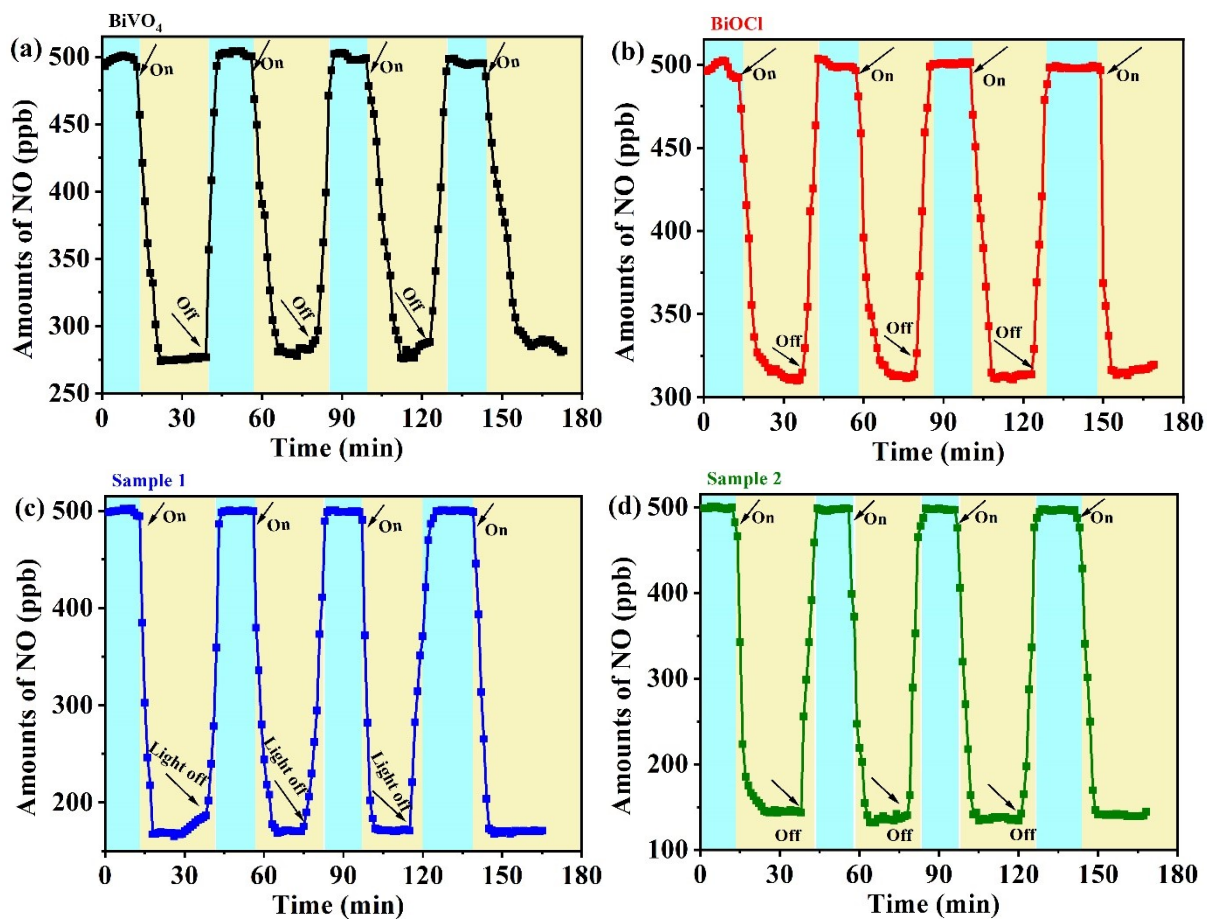

**Fig. S1.** Long-term photocatalytic NO removal in the presence of as-investigated samples for four cycles.

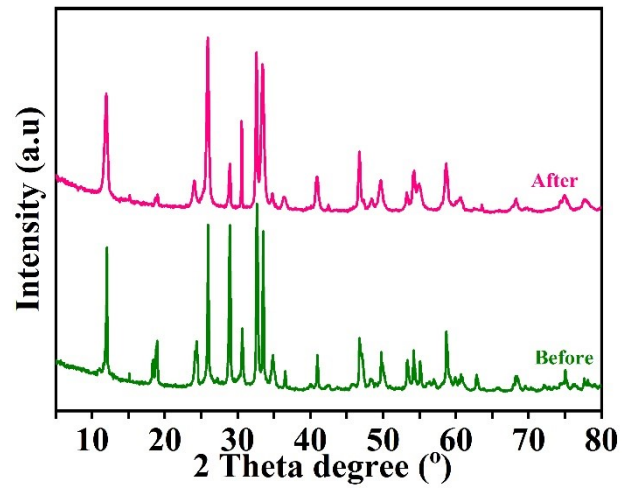

**Fig. S2.** Comparative XRD patterns of as-constructed defective heterojunction (Sample 2) before and after the Long-term photocatalytic NO removal tests.

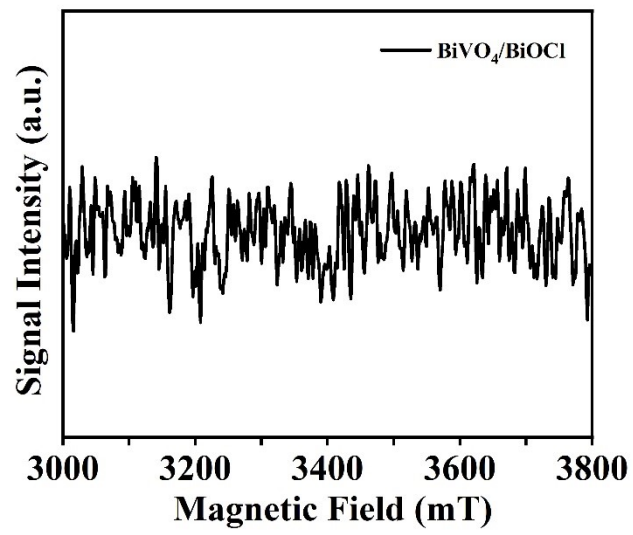

**Fig. S3.** Room-temperature EPR profiles of as-synthesized defect-free BiVO<sub>4</sub>/BiOCl.



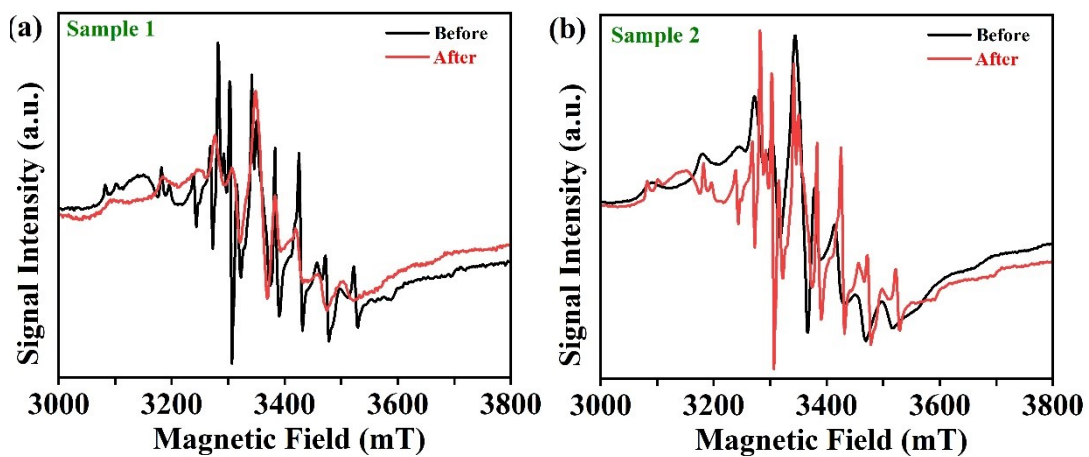

**Fig. S4.** Comparative results of room-temperature EPR profiles of sample 1 and sample 2 photocatalysts before and after the four-runs of NO removal tests, respectively.

### 3. “N Balance” Calculations

The concentration of  $\text{NO}_3^-$  detected by ion chromatography in the washing solution of used  $\text{BiOCl}$ ,  $\text{BiVO}_4$ ,  $\text{BiVO}_4/\text{BiOCl}$  (sample 1), and  $\text{BiVO}_4/\text{BiOCl}$  (sample 2) were 2.9347, 4.129, 1.859, and 2.138  $\mu\text{g/L}$ , respectively.

A. The computational formula of the consumption of NO ( $C_{\text{NO}}$ ) is  $C_{\text{NO}} = \sum_{t=1}^{t=45} \text{NO}$ ; the results in  $\text{BiOCl}$ ,  $\text{BiVO}_4$ ,  $\text{BiVO}_4/\text{BiOCl}$  (sample 1), and  $\text{BiVO}_4/\text{BiOCl}$  (sample 2) were 15.365, 17.166, 11.835, and 10.6255 ppm, respectively.

The computational formula of concentration of consumed NO ( $C_{\text{NO}}$ ) is  $C_{\text{NO}} = \frac{30 \times C_{\text{NO}}}{22.4}$ ; the results in  $\text{BiOCl}$ ,  $\text{BiVO}_4$ ,  $\text{BiVO}_4/\text{BiOCl}$  (sample 1), and  $\text{BiVO}_4/\text{BiOCl}$  (sample 2) were 20.57, 22.99, 15.85, and 14.23  $\mu\text{g/L}$ , respectively.

B. The generated  $\text{NO}_2$  ( $C_{\text{NO}_2}$ ) is:  $C_{\text{NO}_2} = \sum_{t=1}^{t=45} \text{NO}_2$ ; the results in  $\text{BiOCl}$ ,  $\text{BiVO}_4$ ,  $\text{BiVO}_4/\text{BiOCl}$  (sample 1), and  $\text{BiVO}_4/\text{BiOCl}$  (sample 2) were 2.42, 0.39, 3.88, and 1.16 ppm, respectively.

The concentration of NO which converted to  $\text{NO}_2$  ( $C_{\text{NO}/\text{NO}_2}$ ) is  $(C_{\frac{\text{NO}}{\text{NO}_2}}) = \frac{30 \times C_{\text{NO}_2}}{22.4}$ ; the results in  $\text{BiOCl}$ ,  $\text{BiVO}_4$ ,  $\text{BiVO}_4/\text{BiOCl}$  (sample 1), and  $\text{BiVO}_4/\text{BiOCl}$  (sample 2) were 3.25, 0.52, 5.198, and 1.55  $\mu\text{g/L}$ , respectively.

C. The concentration NO which converted to  $\text{NO}_3^-$  is  $(C_{\frac{\text{NO}}{\text{NO}_3}}) = \frac{\text{NO}_3}{62} \times 30$ ; the results in  $\text{BiOCl}$ ,  $\text{BiVO}_4$ ,  $\text{BiVO}_4/\text{BiOCl}$  (sample 1), and  $\text{BiVO}_4/\text{BiOCl}$  (sample 2) were 14.12, 19.98, 8.996, and 11.212  $\mu\text{g/L}$ , respectively.

D. The values of  $C_{\text{NO}/\text{NO}_3} + C_{\text{NO}/\text{NO}_2}$  in different samples were approximately equal to that of consumption NO ( $C_{\text{NO}}$ ). Therefore, the formed  $\text{NO}_2$ , and  $\text{NO}_3$  can meet with the consumed NO.

**Table S2.** Assignments of the IR bands observed on samples during the photocatalytic NO removal.

| Wavenumbers (cm <sup>-1</sup> ) | Assignment                                                        | References |
|---------------------------------|-------------------------------------------------------------------|------------|
| 908                             | N <sub>2</sub> O <sub>4</sub>                                     | S1         |
| 991                             | bi-NO <sub>3</sub> <sup>-</sup>                                   | S2         |
| 1034                            | bi-NO <sub>3</sub> <sup>-</sup> / mo-NO <sub>2</sub> <sup>-</sup> | S3         |
| 1072                            | bi-NO <sub>3</sub> <sup>-</sup> / mo-NO <sub>2</sub> <sup>-</sup> | S3         |
| 1111                            | bi-NO <sub>2</sub> <sup>-</sup>                                   | S3-4       |
| 1237                            | bi-NO <sub>3</sub> <sup>-</sup>                                   | S3-4       |
| 1378                            | free nitrates                                                     | S5         |
| 1432                            | bi-NO <sub>3</sub> <sup>-</sup>                                   | S6         |
| 1495                            | bridging NO <sub>2</sub> <sup>-</sup>                             | S3         |
| 1635                            | bridging NO <sub>2</sub> <sup>-</sup>                             | S3         |

**Table S3.** Summary of synthesis, microstructures, photocatalytic performances and proposed reaction mechanisms of BiVO<sub>4</sub>/BiOCl heterojunctions.

| Photocatalyst                                                | Synthetic method                                        | Microstructures                                                                      | Light source                  | Catalyst Dosage   | Photo performance                                                                                                                       | Mechanisms                                                                                                              | Reference |
|--------------------------------------------------------------|---------------------------------------------------------|--------------------------------------------------------------------------------------|-------------------------------|-------------------|-----------------------------------------------------------------------------------------------------------------------------------------|-------------------------------------------------------------------------------------------------------------------------|-----------|
| BiOCl-BiVO <sub>4</sub>                                      | Photo-deposited crystal plane selectively induce method | BVO <sub>4</sub> nanosheets and BiOCl nanoparticles on (010) and (110) facet of BVO  | 500 W xenon lamp (400-800 nm) | 50 mg             | TC (40 mg/L), 180 min, 90.32%<br>CIP, BHA, phenol, BPA, coumarin (10 mg/L), 180 min: 71.32%, 49.36%, 65.69%, 57.20%, 57.52%             | S-type and Z-type heterojunction<br>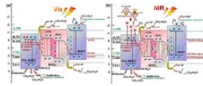 | S7        |
| BiOCl-BiVO <sub>4</sub> :Er <sup>3+</sup> , Yb <sup>3+</sup> | electrospinning combined with a solvothermal method     | BiOCl nanosheets on BiVO <sub>4</sub> :Er <sup>3+</sup> , Yb <sup>3+</sup> nanobelts | 200 W xenon lamp              | 20 mg, 50 mg      | MB (10 mg/L), 120 min, 97.9%<br>TC (10 mg/L), 60 min, 88.8%<br>BPA (10 mg/L), 180 min, 80.8%                                            | S-type heterojunction<br>            | S8        |
| BiOCl-BiVO <sub>4</sub>                                      | solvothermal method                                     | BiVO <sub>4</sub> nanosheets /BiOCl microsphere                                      | 500 W halogen bulb (>420 nm)  | 5 mg, 25 mg, 50mg | RhB (10 ppm), 105 min, 98.82%<br>TC (20 ppm), 70 min, 73.21%<br>K <sub>2</sub> Cr <sub>2</sub> O <sub>7</sub> (10 ppm), 105 min, 68.53% | Z-type heterojunction<br>            | S9        |
| Au-(BiOCl-BiVO <sub>4</sub> )                                | coprecipitation method                                  | sphere and elongated-shapes                                                          | 170 W LED lamp (430-620 nm)   | 250 mg            | MO (10 mg/L), 240 min, 67%                                                                                                              | p-n heterojunction<br>              | S10       |
| BiOCl-BiVO <sub>4</sub>                                      | one-pot combustion method                               | flower-like morphology                                                               | 300 W xenon lamp (>450 nm)    | 100 mg            | RhB (20 mg/L), 180 min, 85%                                                                                                             | p-n heterojunction<br>             | S11       |
| BiOCl-BiVO <sub>4</sub>                                      | hydrothermal treatment                                  | hierarchical microspheres                                                            | Xenon lamp (>400 nm)          | 100 mg            | RhB (10 mg/L), 4 h, 100%                                                                                                                | p-n heterojunction<br>             | S12       |

|                                                         |                                 |                                                          |                             |         |                              |                                                                                                                                                                                                   |           |
|---------------------------------------------------------|---------------------------------|----------------------------------------------------------|-----------------------------|---------|------------------------------|---------------------------------------------------------------------------------------------------------------------------------------------------------------------------------------------------|-----------|
| BiOCl-BiVO <sub>4</sub>                                 | in situ chemical transformation | BiOCl sheets and BiVO <sub>4</sub> nanoparticles         | 500 W xenon lamp (> 420 nm) | 100 mg  | RhB (20 mg/L), 210 min, 93%  | 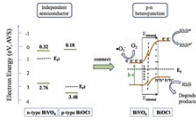 <p>p-n heterojunction</p>  | S13       |
| Bi-BiOCl-BiVO <sub>4</sub>                              | hydrothermal method             | nanosheets                                               | 300 W xenon lamp (> 420 nm) | 200 mg  | RhB (8 mg/L), 40 min, 100%   |  <p>p-n heterojunction</p>  | S14       |
| BiOCl-BiVO <sub>4</sub>                                 | deposition-precipitation method | BiOCl nanoflakes / m-BiVO <sub>4</sub>                   | 500W xenon lamp (> 420 nm)  | 100 mg  | MO (10 mg/L), 6 h, 97.4%     |  <p>p-n heterojunction</p>                                                                                     | S15       |
| BiOCl-AgCl-BiVO <sub>4</sub>                            | one-pot hydrothermal method     | square nanoplates                                        | 60 W LED lamp (> 420 nm)    | 1 g/L   | DCF (5 mg/L), 2.5 h, 72%     |  <p>p-n heterojunction</p>                                                                                     | S16       |
| BiOCl (110)-NrGO-BiVO <sub>4</sub>                      | hydrothermal method             | BiOCl nanoplates / leaf BiVO <sub>4</sub> on NrGO layers | 150 W xenon lamp (< 420 nm) | 50 mg/L | SMZ (15 mg/L), 60min, 96.9%  |  <p>p-n heterojunction</p>                                                                                    | S17       |
| BiVO <sub>4</sub> -BiOCl-Bi <sub>2</sub> S <sub>3</sub> | Sonochemical method             | irregular shapes                                         | 300 W xenon lamp (> 420 nm) | 100 mg  | RhB (10 μM), 20 min, 100%    |  <p>p-n heterojunction</p>                                                                                   | S18       |
| Defective BiVO <sub>4</sub> -BiOCl                      | hydrothermal method             | BiOCl sheets / BiVO <sub>4</sub> nanoparticles           | 300 W xenon lamp (> 420 nm) | 65 mg   | NO (500 ppb), 45 min, 74.51% |  <p>Z-type heterojunction</p>                                                                                | This work |

Note: CIP-Ciprofloxacin; TC-tetracycline; BHA-salicylic acid; BPA-bisphenol a; MB-methylene blue; RhB-Rhodamine b; MO-methyl orange; DCF-diclofenac; SMZ-sulfamethazine

## References

- [S1] L. Jaan, J. R. Ohlsen, Characterization of Nitrogen Oxides by Vibrational Spectroscopy, 2007, p 465-513.
- [S2] G. Ramis, G. Busca, V. Lorenzelli, P. Forzatti, Fourier Transform Infrared Study of the Adsorption and Coadsorption of Nitric Oxide, Nitrogen Dioxide and Ammonia on TiO<sub>2</sub> Anatase, *Appl. Catal. B*, 1990, **64**, 243-257.
- [S3] M. Kantcheva, Identification, Stability, and Reactivity of NO<sub>x</sub> Species Adsorbed on Titania-Supported Manganese Catalysts, *J. Catal.*, 2001, **204**, 479-494.
- [S4] K. Hadjiivanov, V. Avreyska, D. Klissurski, T. Marinova, Surface Species Formed after NO Adsorption and NO + O<sub>2</sub> Coadsorption on ZrO<sub>2</sub> and Sulfated ZrO<sub>2</sub>: An FTIR Spectroscopic Study, *Langmuir*, 2022, **18**, 1619-1625.
- [S5] L. Zhong, Y. Yu, W. Cai, X. X. Geng, Q. Zhong, Structure–activity Relationship of Cr/Ti-PILC Catalysts using A Pre-modification Method for NO Oxidation and their Surface Species Study, *Phy. Chem. Chem. Phys.*, 2015, **17**, 15036-15045.
- [S6] J. C. S. Wu, Y. T. Cheng, In Situ FTIR Study of Photocatalytic NO Reaction on Photocatalysts under UV Irradiation, *J. Catal.*, 2006, **237**, 393-404.
- [S7] Q. Yang, G. Q. Tan, L. X. Yin, W. L. Liu, B. X. Zhang, S. J. Feng, Y. Bi, Y. Liu, T. Liu, Z. Q. Wang, H. J. Ren, A. Xia, Full-spectrum Broad-spectrum Degradation of Antibiotics by BiVO<sub>4</sub>@BiOCl Crystal Plane S-type and Z-type Heterojunctions, *Chem. Eng. J.*, 2023, **467**, 143450.
- [S8] F. Liu, Y. Q. Wang, D. Xu, F. Sun, S. C. Zhang, W. L. Wang, X. Y. Li, W. S. Yu, H. Yu, X. T. Dong, Full-spectrum-responsive 1D/2D BiVO<sub>4</sub>:Er<sup>3+</sup>,Yb<sup>3+</sup>/BiOCl Core-shell S-scheme Heterostructure with Boosted Charge Transport and Redox Capacity for the Efficient Removal of Organic Pollutants, *Ceram. Int.*, 2023, **49**, 13371-13385.
- [S9] Q. H. Li, M. Wang, J. Y. He, Y. W. Wang, In Situ Synthesis of Core-shell like BiVO<sub>4</sub>/BiOCl Heterojunction with Excellent Visible-light Photocatalytic Activity, *Opt. Mater.*, 2023, **144**, 114266.
- [S10] M. de la, Garza-Galván, P. Zambrano-Robledo, J. Vazquez-Arenas, I. Romero-Ibarra, et al., In Situ Synthesis of Au-decorated BiOCl/BiVO<sub>4</sub> Hybrid Ternary System with Enhanced Visible-light Photocatalytic Behavior, *Appl. Surf. Sci.*, 2019, **487**, 743-754.

- [S11] D. D. Lv, D. F. Zhang, X. P. Pu, D. Z. Kong, Z. H. Lu, X. Shao, H. Y. Ma, J. M. Dou, One-pot Combustion Synthesis of BiVO<sub>4</sub>/BiOCl Composites with Enhanced Visible-light Photocatalytic Properties, *Sep. Purif. Technol.*, 2017, **174**, 97-103.
- [S12] L. J. Song, Y. Y. Pang, Y. J. Zheng, C. F. Chen, L. Ge, Preparation and Enhanced Photocatalytic Activity of Porous BiOCl/BiVO<sub>4</sub> Microspheres via A Coprecipitation-Hydrothermal Method, *J. Alloys Compd.*, 2017, **710**, 375-382.
- [S13] L. W. Shan, Y. T. Liu, J. Suriyaprakash, C. G. Ma, Z. Wu, L. M. Dong, L. Z. Liu, Highly Efficient Photocatalytic Activities, Band Alignment of BiVO<sub>4</sub>/BiOCl {001} Prepared by In Situ Chemical Transformation, *J. Mol. Catal. A Chem.*, 2016, **411**, 179-187.
- [S14] C. C. Feng, D. H. Wang, B. J. Jin, Z. B. Jiao, The Enhanced Photocatalytic Properties of BiOCl/BiVO<sub>4</sub> p-n Heterojunctions via Plasmon Resonance of Metal Bi, *RSC Adv.*, 2015, **5**, 75947-75952.
- [S15] J. Cao, C. C. Zhou, H. L. Lin, B. Y. Xu, S. F. Chen, Surface Modification of m-BiVO<sub>4</sub> with Wide Band-gap Semiconductor BiOCl to Largely Improve the Visible Light Induced Photocatalytic Activity, *Appl. Surf. Sci.*, 2013, **284**, 263-269.
- [S16] R. Akbarzadeh, A. Asadi, P. O. Oviroh, T.-C. Jen, One-Pot Synthesized Visible Light-Driven BiOCl/AgCl/BiVO<sub>4</sub> n-p Heterojunction for Photocatalytic Degradation of Pharmaceutical Pollutants, *Mater.* 2019, **12**, 2297.
- [S17] X. F. Yang, Y. T. Xu, S. Naraginti, X. Y. Wei, Enhanced Sulfamethazine Detoxification by A Novel BiOCl (110)/NrGO/BiVO<sub>4</sub> Heterojunction, *Environ. Res.*, 2023, **232**, 116351.
- [S18] T. Kansaard, K. N. Ishihara, W. Pecharapa, Characterization and Visible Light-Driven Photocatalytic Activity of BiVO<sub>4</sub>/BiOCl/Bi<sub>2</sub>S<sub>3</sub> Nanocomposites Prepared by Sonochemical Process, *Phys. Status Solidi A*, 2023, **220**, 2200447.
